# Supplementary material
Source: PubMed Central journal article supplement (PMC7343789)
Supplement: 41422_2020_312_MOESM1_ESM.pdf [file 41422_2020_312_MOESM1_ESM.pdf]

**Supplementary information Figure S1**

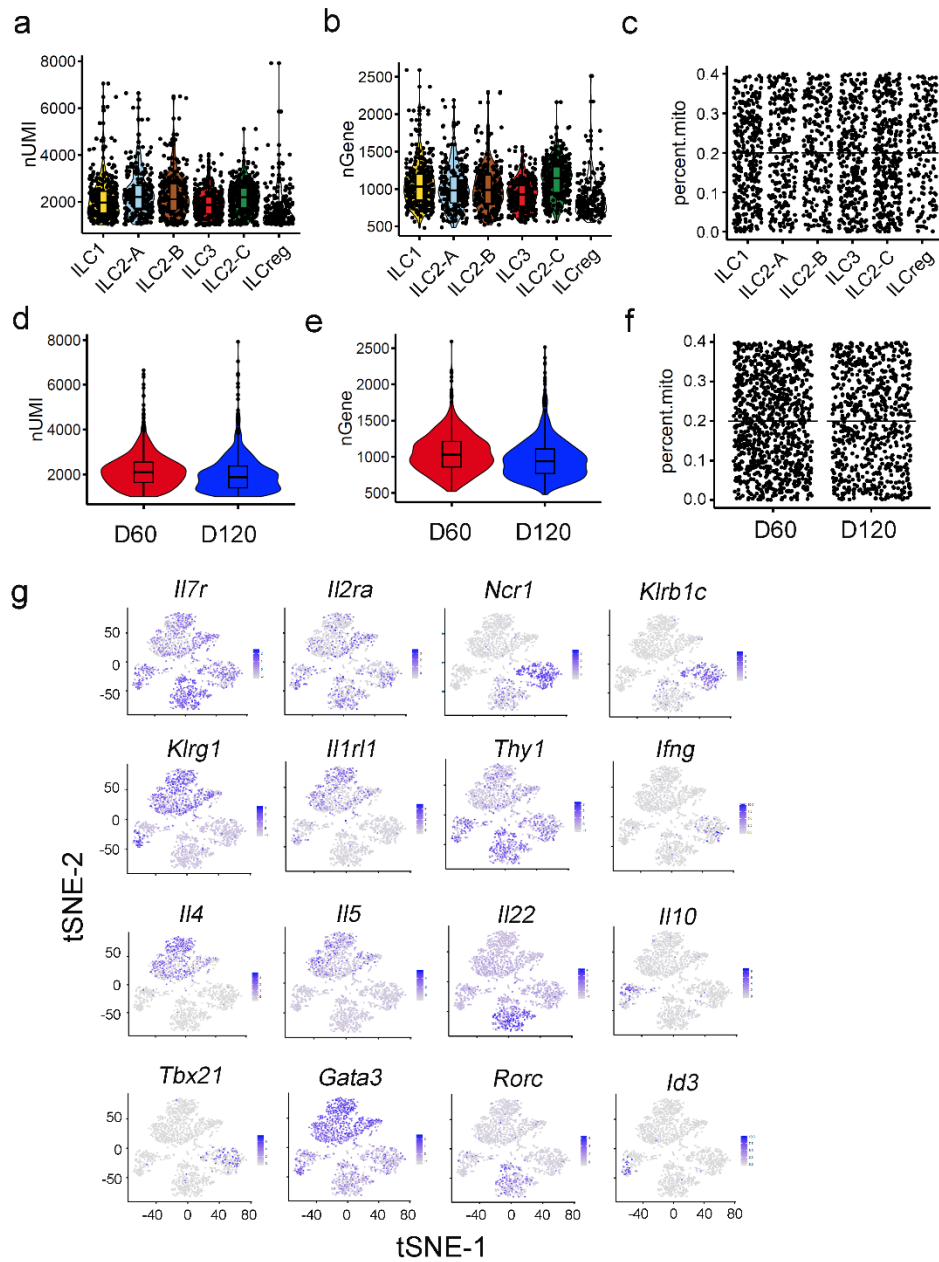

**Supplementary information Fig. S1. Features of tumor infiltrating ILCs revealed by scRNA sequencing.** (a-c) Number of unique molecular identifiers (nUMI), identified genes and fractions of reads mapping to mitochondrial genes of indicated cell clusters were shown. (d-f) nUMI, identified genes and fractions of reads mapping to mitochondrial genes of cell samples at D60 and D120 were shown. (g) Scale data derived from Seurat analysis pipeline to plot the ILC signature genes on a tSNE plot from Fig. 1b.
