# Supplementary material
Source: PubMed Central journal article supplement (PMC7343789)
Supplement: 41422_2020_312_MOESM4_ESM.pdf [file 41422_2020_312_MOESM4_ESM.pdf]

### Supplementary information Fig. S4

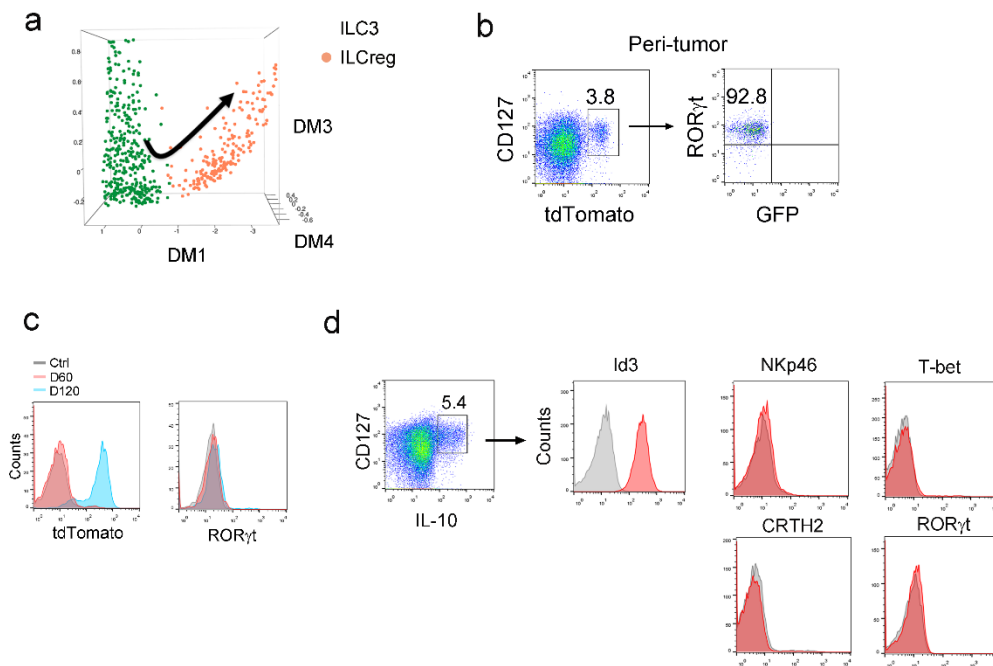

**Supplementary information Fig. S4. Depletion of ILCreg cells.** (a) Diffusion map over ILC3 and ILCreg cells. Diffusion map was drawn using the Seurat package command RunDiffusion by using top 10 marker genes of ILC3 and ILCreg. DM1, DM3, DM4 were used to plot the three-dimensional diffusion map. (b) Analysis of exILC3 cells in peri-tumor tissues. exILC3 cells from peri-tumor tissues of *Rosa26-STOP-tdTomato;Rorc-Cre;IL-10-GFP* mice were analyzed by flow cytometry. (c) Tumor infiltrating IL-10-GFP<sup>+</sup> ILCregs (Lin<sup>-</sup>CD45<sup>+</sup>CD127<sup>+</sup>IL-10-GFP<sup>+</sup>) from *Rosa26-STOP-tdTomato;Rorc-Cre;IL-10-GFP* mice were analyzed for expression of TdTomato and ROR $\gamma$ t by flow cytometry at indicated time points. ILCregs from IL-10-GFP mice served as negative control (Ctrl). (d) Analysis of ILCregs (Lin<sup>-</sup>CD45<sup>+</sup>CD127<sup>+</sup>IL-10<sup>+</sup>) in tumor samples from CRC patients by flow cytometry. Grey lines indicated isotype controls of detection antibodies (Lin=CD2,CD3,CD14,CD16,CD19,CD56,CD235a). Data are representative of at least four independent experiments.
