# Supplementary material
Source: PubMed Central journal article supplement (PMC7343789)
Supplement: 41422_2020_312_MOESM5_ESM.pdf [file 41422_2020_312_MOESM5_ESM.pdf]

## Supplementary information Fig. S5

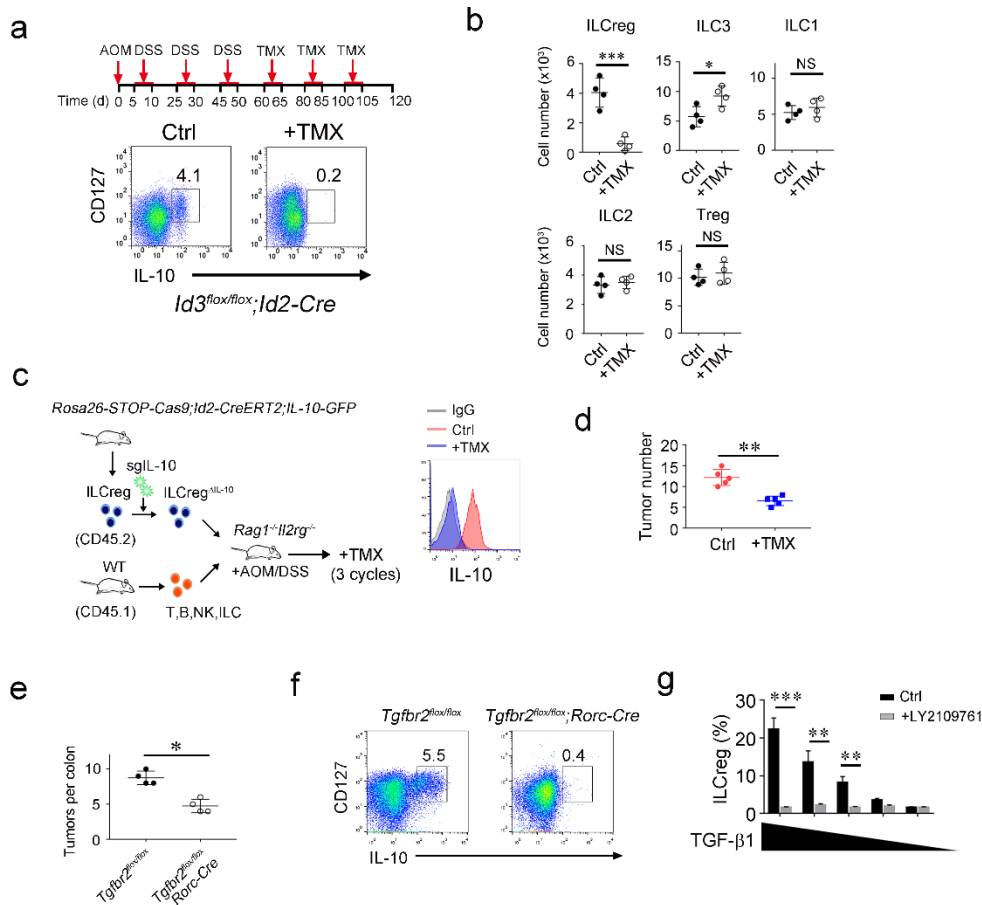

**Supplementary information Fig. S5. TGF- $\beta$  signaling is required for the conversion of ILC3 to ILCreg.** (a)  $Id3^{flox/flox}; CreERT2$  mice were treated as described. At day 120, colon tumor cells were isolated and ILCreg (Lin-CD45<sup>+</sup>CD127<sup>+</sup>IL-10<sup>+</sup>) cells were analyzed by flow cytometry. (b) Analysis of indicated lymphocytes from  $Id3^{flox/flox}; CreERT2$  mice with indicated treatment by flow cytometry. Cell numbers were calculated and shown as means $\pm$ SD. \*,  $P < 0.05$ ; \*\*,  $P < 0.01$ ; NS, not significant by Two-tailed unpaired Student's  $t$ -test.  $n = 5$  for each group. (c) Adoptive transfer assays with IL-10-deleted ILCregs (ILCreg $^{\Delta IL-10}$ ). ILCregs from  $Rosa26-STOP-Cas9; Id2-ERT2-Cre; IL-10-GFP$  mice were isolated and infected with lentivirus carrying sgRNA against *Il10* gene. Infected cells were selected with 1  $\mu$ g/ml puromycin and transferred into  $Rag1^{-/-}; Il2rg^{-/-}$  mice together with respective WT (CD45.1) lymphocytes. IL-10 expression in ILCregs (CD45.2) after treatment with TMX was detected prior to transplantation (right panel) by flow cytometry. ILCregs infected with lentivirus carrying empty vector were used as a negative control (Ctrl). (d) ILCreg $^{\Delta IL-10}$  transferred mice were subjected to AOM/DSS treatment. At day 60, mice were treated with TMX for 3 cycles as in (a). At day 120, tumors in colon from indicated mice were calculated and shown as means $\pm$ SD. \*\*,  $P < 0.01$  by Two-tailed unpaired Student's  $t$ -test.  $n = 5$  for each group. (e-f)  $Tgfb2^{flox/flox}$  and  $Tgfb2^{flox/flox}; Rorc-Cre$  mice were subjected to AOM/DSS treatment. Tumor numbers were calculated and shown

as means $\pm$ SD. \*\*,  $P < 0.01$ . Two-tailed unpaired Student's  $t$ -test was used.  $n=5$  for each group (e). ILCreg (Lin<sup>-</sup>CD45<sup>+</sup>CD127<sup>+</sup>IL-10<sup>+</sup>) from colon tumors of indicated mice were analyzed by flow cytometry (f). (g) TdTomato<sup>+</sup>ILC cells (tdTomato<sup>+</sup>CD127<sup>+</sup>CD45<sup>+</sup>Lin<sup>-</sup>) were isolated from AOM/DSS induced colon tumors from *Rosa26-STOP-tdTomato;Rorc-Cre;IL-10-GFP* mice. TdTomato<sup>+</sup>ILC cells treated with different doses of TGF- $\beta$  (from 4 ng/ml to 20 ng/ml) in complete cell culture in the presence or absence with 2  $\mu$ M TGF- $\beta$  inhibitor LY2109761. After 7 days, cultured cells were analyzed by flow cytometry for IL-10-GFP<sup>+</sup> ILCreg cells. Percentage of ILCreg cells were calculated and shown as means $\pm$ SD. \*\*,  $P < 0.01$  Two-tailed unpaired Student's  $t$ -test. Data are representative of at least four independent experiments.
