# Supplementary material
Source: PubMed Central journal article supplement (PMC7343789)
Supplement: 41422_2020_312_MOESM6_ESM.pdf [file 41422_2020_312_MOESM6_ESM.pdf]

**Supplementary information Table S1.**

|                   |                              |
|-------------------|------------------------------|
| <i>Hs3st1-F</i>   | 5'-GCCTTGCTGCTACTTCAT-3'     |
| <i>Hs3st1-R</i>   | 5'-ATTGGATGCTGTGCCTTC-3'     |
| <i>Hilpda-F</i>   | 5'-TGGACCTAAGTATCTTCTGTTG-3' |
| <i>Hilpda-R</i>   | 5'-TGACCTGGACACTGGATAG-3'    |
| <i>Tnfrsf18-F</i> | 5'-CCAGACGCTACAAGACTT-3'     |
| <i>Tnfrsf18-R</i> | 5'-TAACTCACCGCTCTCATAC-3'    |
| <i>Ctla2a-F</i>   | 5'-GTGACTTGACTCCAGAAGAA-3'   |
| <i>Ctla2a-R</i>   | 5'-CTCCAGCATCATTCTCTC-3'     |
| <i>Ltb4r1-F</i>   | 5'-GGCACTAAGACAGATTCAAG-3'   |
| <i>Ltb4r1-R</i>   | 5'-CACAGACAGTAGAACAATGG-3'   |
| <i>Pdcd1-F</i>    | 5'-AGATTCTTCAGCCATTAGCA-3'   |
| <i>Pdcd1-R</i>    | 5'-GTAGGATTCAGGAGACATAGG-3'  |
| <i>Hes1-F</i>     | 5'-GCTAGAGAAGGCAGACATT-3'    |
| <i>Hes1-R</i>     | 5'-GTAGGTCATGGCGTTGAT-3'     |
| <i>Hey1-F</i>     | 5'-CGAGACCGAATCAATAACAG-3'   |
| <i>Hey1-R</i>     | 5'-AACTCCGATAGTCCATAGC-3'    |
| <i>Fosb-F</i>     | 5'-TCTTCGGTGGACTCCTTC-3'     |
| <i>Fosb-R</i>     | 5'-CCTGGCTGGTTGTGATTG-3'     |

**Supplementary information Table S1. Real time PCR primers used in Supplementary information Figs. S3a and S3g.**
