# Supplementary material
Source: PubMed Central journal article supplement (PMC7343789)
Supplement: 41422_2020_312_MOESM7_ESM.pdf [file 41422_2020_312_MOESM7_ESM.pdf]

**Supplementary information Table S2.**

|                         |                               |
|-------------------------|-------------------------------|
| sgRNA- <i>HS3ST1</i> #1 | 5'-GGGCGACGTGAAATACGCGGGGG-3' |
| sgRNA- <i>HS3ST1</i> #2 | 5'-CGCCATCGCGGACGTCATCCTGG-3' |
| sgRNA- <i>PDCD1</i> #1  | 5'-TGTAGCACCGCCCAGACGACTGG-3' |
| sgRNA- <i>PDCD1</i> #2  | 5'-CACCGCCCAGACGACTGGCCAGG-3' |

**Supplementary information Table S2. sgRNA sequences used in Fig. 4d and Fig. 4f**
